# Supplementary material for: Evaluation of Agronomic Characteristics, Disease Incidence, Yield Performance, and Aflatoxin Accumulation among Six Peanut Varieties (Arachis hypogea L.) Grown in Kenya
Source: Toxins (Basel). 2023 Jan 28;15(2):111. doi: 10.3390/toxins15020111 (PMC9962968; doi:10.3390/toxins15020111)
Supplement: Supplementary file 1 [file toxins-15-00111-s001.zip › toxins-2116376-supplementary.pdf]

## Method Validation

Various method validation parameters were evaluated they are standards linearity, recovery, accuracy, precision Limit of quantification (LOD), Limit of quantification (LOQ)

Linearity of standards was evaluated by consecutively injecting standards ranging from 0.52-104.1 ng/ml for each of the toxins at 6 levels. Spike recovery was performed at 3 levels (0.5MRL, 1MRL, and 2MRL) for each of the toxin i.e. 7.5,15 and 30 ng/g in six replicates. See data in table 1 below

Table S1: Summary of linearity and results from spike recovery (n=6)

| Toxin            | Calibration standards<br>Linearity<br>Range | Spike recovery     |                   |                   |                           |                                         |
|------------------|---------------------------------------------|--------------------|-------------------|-------------------|---------------------------|-----------------------------------------|
|                  |                                             | Level 1<br>7.5ng/g | Level 2<br>15ng/g | Level 3<br>30ng/g | Average spike<br>recovery | Spike recovery<br>standard<br>deviation |
| AFB1             | 0.52-104.1                                  | 77.6               | 74.01             | 74.43             | 75.36                     | 1.63                                    |
| AFB2             | 0.52-103.9                                  | 74.06              | 75.65             | 74.14             | 74.62                     | 0.73                                    |
| AFG1             | 0.52-103.9                                  | 102.32             | 84.18             | 76.52             | 87.67                     | 10.82                                   |
| AFG2             | 0.52-104.1                                  | 58.16              | 75.20             | 80.92             | 71.42                     | 9.67                                    |
| Total aflatoxins |                                             |                    |                   |                   |                           |                                         |

Evaluation of the method accuracy was performed by running QC (T04422QC peanut slurry) material obtained from Fera Science Ltd (Sand Hutton, York. UK) and past proficiency test sample from AOCS i.e. sample 5 and sample 6 of 34 aflatoxin peanut paste test 20220-2021. The data is shown in table 2 and 3 below.

Table S2: comparison between assigned value and measured value of quality control material T04422QC peanut slurry obtained from Fera science

| Aflatoxin       | Assigned value<br>(ng/g) | Range<br>(ng/g) | Measured value<br>(n-6) (ng/g) |
|-----------------|--------------------------|-----------------|--------------------------------|
| Aflatoxin B1    | 3.75                     | 2.10-5.40       | 3.44±0.65                      |
| Aflatoxin B2    | 2.75                     | 1.54-3.96       | 2.82±0.46                      |
| Aflatoxin G1    | 1.85                     | 1.04-2.67       | 1.51±0.21                      |
| Aflatoxin G2    | 1.73                     | 0.97-2.49       | 2.21±0.32                      |
| Total aflatoxin | 10.0                     | 5.6-14.4        | 9.97±0.84                      |

Table S3: comparison between assigned value and measured value of AOCS sample 5 and sample 6 of 34 aflatoxin peanut paste test 20220-2021

| Sample   | Toxin           | Consensus value (ng/g) | Range (ng/g) | Measured value (ng/g) |
|----------|-----------------|------------------------|--------------|-----------------------|
| Sample 5 | Total aflatoxin | 14.85                  | 7.96-21.73   | 21.35                 |
| Sample 6 | Total aflatoxin | 10.2                   | 5.4-15.0     | 14.21                 |

Additionally, the method was subjected to proficiency testing for the year 2022 and satisfactory results were obtained as illustrated in table 3 below.

Table S4: Summary of proficiency testing results; Aflatoxins in peanut (water/Nut slurry)

| Analyte/Toxin   | Laboratory Reported value µg/kg | PT assigned value µg/kg | Lab z-Score | PT Range value µg/kg | FAPAS PT04453 |
|-----------------|---------------------------------|-------------------------|-------------|----------------------|---------------|
| Aflatoxin B1    | 4.24                            | 4.72                    | -0.5        | 2.62-6.79            |               |
| Aflatoxin B2    | 3.18                            | 3.49                    | -0.4        | 1.95-5.02            |               |
| Aflatoxin G1    | 1.68                            | 2.38                    | -1.3        | 1.34-3.43            |               |
| Aflatoxin G2    | 1.89                            | 1.68                    | 0.6         | 0.943-2.42           |               |
| Total Aflatoxin | 10.99                           | 12.3                    | -0.5        | 6.87-17.7            |               |

Limit of detection and limit of quantification were determined from the data obtained from the six replicate measurements of the quality control material **T04422QC peanut slurry** using the standard deviation method as recommended by B. Magnusson and U. Ornemark. (2014)

Data on the method LOD and LOQ are shown in table 5

**Table S5: LOD and LOQ method specifics**

| Toxin           | LOD ng/g | LOQ ng/g |
|-----------------|----------|----------|
| Aflatoxin B1    | 0.79     | 2.639    |
| Aflatoxin B2    | 0.56     | 1.86     |
| Aflatoxin G1    | 0.26     | 0.88     |
| Aflatoxin G2    | 0.40     | 1.32     |
| Total aflatoxin | 1.03     | 3.42     |

**Table S6: Percentage of positive samples analyzed for aflatoxins**

| Variety         | Aflatoxin B1 | Aflatoxin B2 | Aflatoxin G1 | Aflatoxin G2 | Total Aflatoxins |
|-----------------|--------------|--------------|--------------|--------------|------------------|
| CG7             | 50           | 0            | 50           | 100          | 100              |
| CG9             | 0            | 0            | 50           | 50           | 75               |
| CG12            | 50           | 25           | 75           | 75           | 75               |
| ICGV-SM 90704   | 25           | 0            | 50           | 100          | 100              |
| 12991           | 50           | 50           | 100          | 100          | 100              |
| Homabay         | 0            | 100          | 100          | 100          | 100              |
| Local (Control) |              |              |              |              |                  |

**Table S7: Calibration information**

| Toxin | Retention time (min) | Calibration range (ng/ml) | Calibration equation   | Coefficient of correlation |
|-------|----------------------|---------------------------|------------------------|----------------------------|
| AFG2  | 4.125                | 104.1-0.521               | $Y = (12116.2)X + (0)$ | 0.9995                     |
| AFG1  | 4.991                | 103.9-0.520               | $Y = (1734.77)X + (0)$ | 0.9996                     |
| AFB2  | 6.225                | 103.9-0.520               | $Y = (13358.7)X + (0)$ | 0.9996                     |
| AFB1  | 7.686                | 104.10.5205               | $Y = (2929.36)X + (0)$ | 0.9995                     |

**Figure S1: AFG2 calibration curve**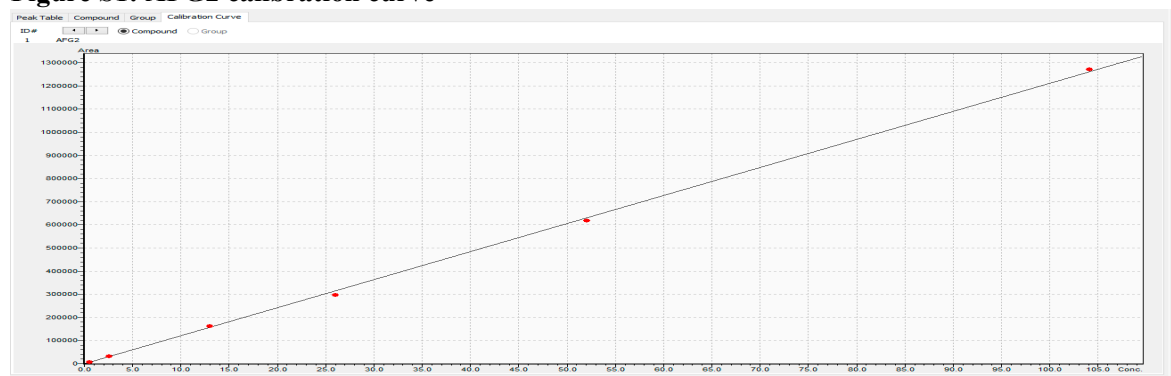

Figure S2: AFG1 calibration curve

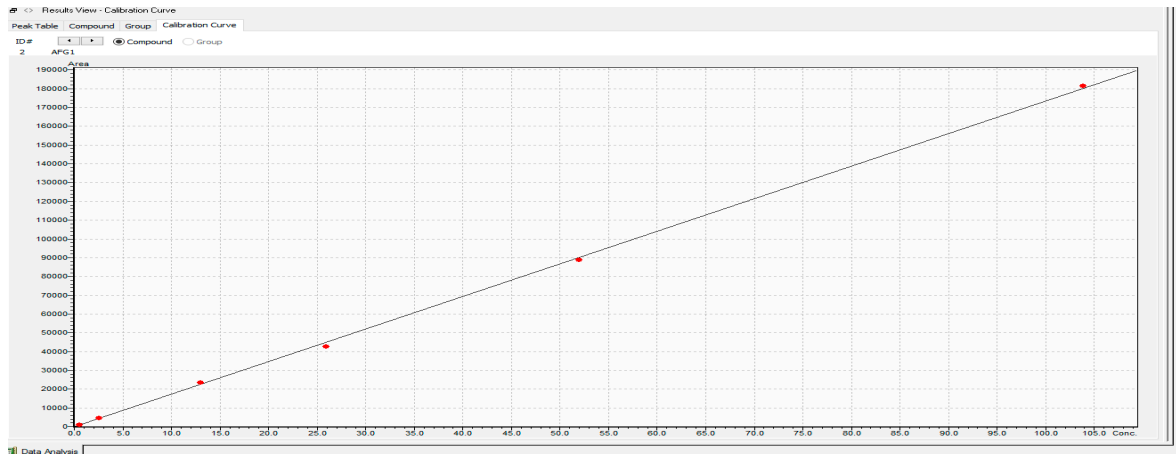

Figure S3: AFB2 calibration curve

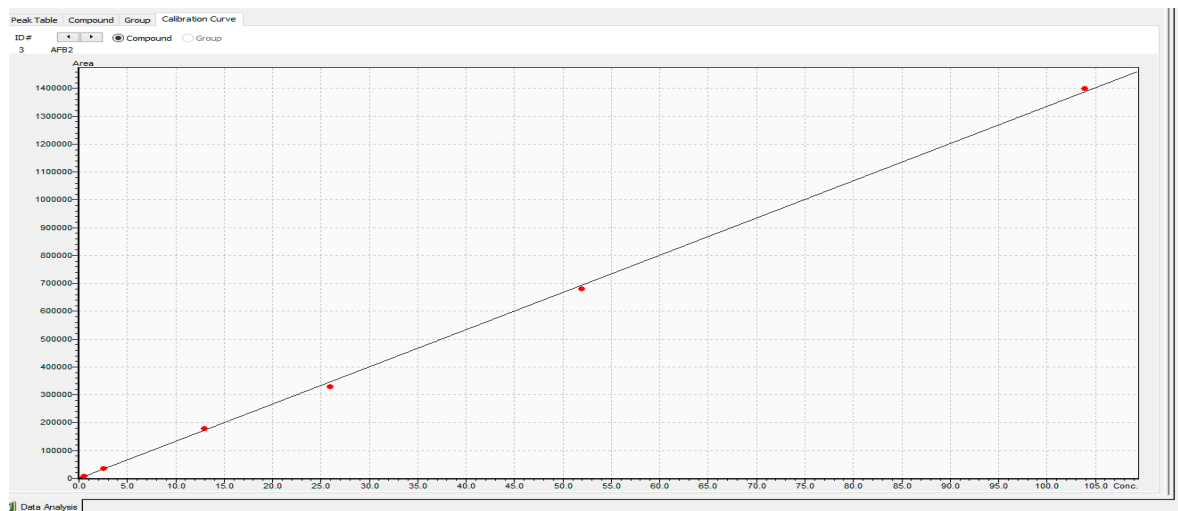

Figure S4: AFB1 calibration curve

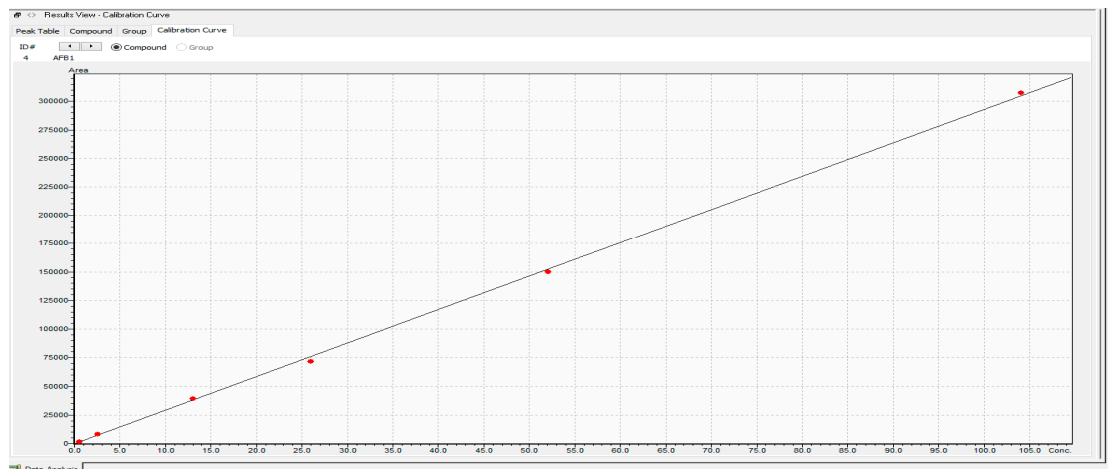

**Figure S5: Over-layed chromatogram of simple and standard**

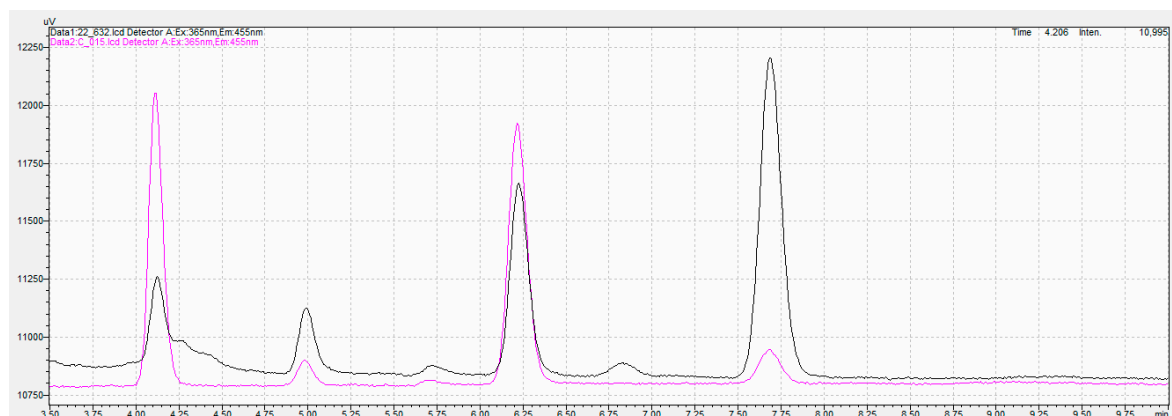

Key: Red chromatogram – calibration standard

Black chromatogram- sample extract

**Table S8: Abbreviation List**

| Abbreviation | Definition                                                              |
|--------------|-------------------------------------------------------------------------|
| ACR          | Aspergillus crown rot                                                   |
| AEZ          | Agro ecological zones                                                   |
| AFB1         | Aflatoxin B1                                                            |
| AFB2         | Aflatoxin B2                                                            |
| AFG1         | Aflatoxin G1                                                            |
| AFG2         | Aflatoxin G2                                                            |
| ANOVA        | Analysis of Variance                                                    |
| Ca           | Calcium                                                                 |
| ELS          | Early leaf spot                                                         |
| Fe           | Iron                                                                    |
| GRV          | Groundnut Rosette Virus                                                 |
| HSD          | Honestly significant difference                                         |
| ICRISAT      | Crops Research Institute for the Semi-Arid Tropics                      |
| LLS          | Late leaf spot                                                          |
| M.A.S.L.     | Meters above sea level                                                  |
| Mg           | Magnesium                                                               |
| PDA          | Potato Dextrose Agar                                                    |
| PPB          | Parts per billion                                                       |
| PTFE         | <b>Polytetrafluoroethylene</b>                                          |
| UHPLC-FLD    | Ultra High Performance Liquid Chromatography and Fluorescence Detection |
| Zn           | Zinc                                                                    |

**Table S9: List of Materials and Reagents**

|                                                                |                                            |
|----------------------------------------------------------------|--------------------------------------------|
| Newly improved peanut varieties (CG7, CG12, CG7, ICGV-SM 90704 | ICRISAT Malawi                             |
| Locally used varieties (12991, Homabay Local)                  | Homabay                                    |
| Animal manure                                                  | Locally sourced (Nyakach)                  |
| Ridomil Gold                                                   | Syngenta                                   |
| Duduthrin 1.75EC                                               | Twiga chemicals                            |
| Ethanol                                                        | Scharlau                                   |
| Methanol                                                       | Scharlau                                   |
| Sodium hypochlorite                                            | Insulation world Kenya                     |
| Distilled water                                                | Scharlau                                   |
| Potato Dextrose Agar (PDA)                                     | Hi media                                   |
| Weighing balance                                               | Sartorius                                  |
| Super pro moisture analyzer                                    | Supertech agroline                         |
| Grinder                                                        | Herbs and spices                           |
| Drying canvas                                                  | Locally made                               |
| Airtight plastic containers                                    | Afro plastics limited                      |
| Polypropylene centrifuge tube                                  | BD, Franklin Lakes, NJ, USA                |
| Falcon tubes                                                   | BD, Franklin Lakes, NJ, USA                |
| Mechanical orbital shaker                                      | New Brunswick, NJ, USA                     |
| PTFE syringe filter                                            | New Brunswick, NJ, USA                     |
| Nexera UHPLC system                                            | (Shimadzu Corporation, Kyoto, Japan)       |
| A Synergi Hydro-RP analytical column                           | (Phenomenex, Torrance, CA, USA)            |
| LabSolutions software version 5.89                             | (Shimadzu Corporation, Kyoto, Japan, 2014) |
